# Supplementary material for: Alkalihalobacterium elongatum gen. nov. sp. nov.: An Antibiotic-Producing Bacterium Isolated From Lonar Lake and Reclassification of the Genus Alkalihalobacillus Into Seven Novel Genera
Source: Front Microbiol. 2021 Oct 11;12:722369. doi: 10.3389/fmicb.2021.722369 (PMC8543038; doi:10.3389/fmicb.2021.722369)
Supplement: Supplementary file 15 [file Table_5.xlsx]

## Sheet: Table_S5_AAI and POCP
Supplementary Table S5. AAI (left below) and POCP (right above) between the strain MEB199T, type strains of the genus Alkalihalobacillus and members of nearest genera.
			1	2	3	4	5	6	7	8	9	10	11	12	13	14	15	16	17	18	19	20	21	22	23	24	25	26	27	28	29	30	31	32	33	34	35	36	37	38	39	40	41
			POCP Values
Strain MEB199T	1	AAI values		72.1646	57.1111	48.1565	46.2055	44.5289	59.0877	58.3182	56.9259	57.4123	57.6479	47.7169	57.1397	39.1424	45.8703	42.1948	42.2434	42.4531	42.107	41.0546	42.8007	41.1946	54.342	51.4935	50.7612	48.892	48.6302	41.0432	49.7047	50.1394	49.2695	57.4407	46.5366	38.7478	43.5881	48.1425	47.6897	28.3563	42.9522	42.1543	38.6863
Alkalihalobacillus alkalinitrilicus DSM 22532T	2		80.8329		53.3915	47.1079	44.1687	43.3073	55.6305	57.5211	55.7569	55.8144	57.0345	46.9925	54.5005	36.5343	45.0782	41.7638	40.6958	41.5114	40.268	40.4725	41.3009	39.6264	53.2583	49.4997	49.7512	46.1763	46.6855	39.7263	48.3871	47.5468	48.7205	56.9235	46.6692	37.5845	43.1765	47.3399	44.3456	27.398	41.674	41.0798	37.916
Alkalihalobacillus bogoriensis ATCC BAA-922T	3		64.3731	63.9643		51.2362	48.6534	48.6538	59.1411	53.5779	54.2932	56.3018	52.6652	53.6482	53.37	39.1208	45.2207	43.9314	43.4745	44.1215	43.5494	43.5276	44.1598	42.777	51.6154	53.944	51.6167	47.0009	46.047	41.9966	48.1096	45.5414	45.3945	52.2541	43.3783	38.4232	41.7445	46.2798	46.041	28.295	42.205	42.6844	38.3925
Alkalihalobacillus alcalophilus ATCC 27647T	4		59.0268	59.5313	58.9337		67.5892	60.8852	55.973	55.2093	54.618	57.2379	55.867	54.4045	55.7448	44.0935	50.7408	50.4287	50.523	50.9758	50.6586	50.5071	51.0537	49.0751	53.1634	53.3977	54.2938	45.8586	44.0777	42.9139	44.4681	41.2016	42.3385	47.0607	42.1778	38.7219	42.8309	46.6108	43.3451	27.1552	41.7318	46.0103	40.9375
Alkalihalobacillus pseudalcaliphilus DSM 8725T	5		57.5749	57.6306	57.2047	72.8664		60.1834	51.5186	50.7101	49.2164	52.6476	51.8088	50.6002	52.7946	43.1273	47.9316	48.7199	50.0622	51.0605	50.2722	50.1475	49.4649	49.0827	49.3048	51.0074	50.0495	44.2158	43.0272	41.6464	41.3361	38.4802	38.1165	43.895	39.807	38.267	40.6994	43.6518	42.4422	25.323	39.6822	45.4712	39.2146
Alkalihalobacillus trypoxylicola KCTC 13244T	6		57.9594	58.1418	57.9992	68.6261	66.8648		51.0943	49.2635	48.2694	51.6132	50.9093	53.5645	50.4091	41.481	45.9986	48.5156	48.7171	49.6404	48.3875	48.7877	49.0157	48.0235	48.6095	50.8463	49.6728	41.5564	40.4193	41.4569	41.9815	37.0444	36.8642	42.8541	39.1727	35.8731	38.0758	40.6481	38.7665	25.3265	39.5153	42.6031	37.9879
Alkalihalobacillus akibai JCM 9157T	7		62.1548	62.1607	61.8219	63.7685	60.6771	61.1985		68.3441	68.776	70.3139	61.6995	57.7327	60.6957	40.2135	49.4535	46.9839	46.4592	46.9933	46.3905	46.4658	47.4429	45.1054	55.4067	56.1033	55.3941	48.0938	47.1888	42.6697	48.7623	47.8223	48.3975	54.0884	46.0718	38.8125	44.0727	47.3915	46.8716	29.0488	43.1431	43.1379	39.1959
Alkalihalobacillus krulwichiae AM31DT	8		61.9705	62.0258	61.1916	63.2764	60.6943	60.9764	75.9259		65.9016	68.4482	63.0998	54.6112	61.3354	41.5761	50.0215	47.184	46.7494	47.097	46.6587	46.8334	47.4535	45.4632	58.3705	55.9401	54.7142	47.9318	46.7753	43.4519	49.6218	48.1502	46.8008	56.0454	48.1158	39.4071	45.1016	48.6752	46.0897	29.3852	43.9727	44.3961	39.905
Alkalihalobacillus wakoensis JCM 9140T	9		62.1022	61.8072	61.256	64.0153	60.3879	60.862	73.937	72.7637		72.7629	62.2317	55.0406	59.5847	39.9844	48.1006	45.8505	45.5854	45.2712	45.0797	45.6656	45.6995	44.0551	57.1255	53.8939	54.511	46.7256	45.6561	41.731	48.9402	48.0905	47.8522	54.4731	46.3472	37.6264	42.7921	46.5366	44.7387	28.189	42.6866	43.1105	38.7504
Alkalihalobacillus okhensis Kh10-101T	10		62.3301	62.1337	61.5613	64.3554	60.4837	60.7061	74.5071	73.582	79.7304		61.1622	58.0709	61.9336	41.1209	50.259	48.5865	47.3971	48.8034	47.1766	47.4612	48.8652	46.0371	57.2721	56.6335	55.7445	48.8617	47.1195	44.1635	50.6212	48.1906	47.38	54.3516	47.2476	39.8303	44.7808	48.9056	46.5149	30.0638	43.5866	45.5016	40.8771
Alkalihalobacillus nanhaiisediminis CGMCC 1.10116T	11		62.9307	63.2872	61.9237	64.129	62.482	62.6519	70.898	70.8911	70.2608	71.25		53.02	65.6041	45.3066	52.4263	49.1035	48.971	47.7116	48.7957	48.9996	49.4811	47.283	67.6021	57.715	57.6004	51.3527	48.8723	45.4275	48.483	48.0624	45.4814	57.41	49.9943	39.3601	44.7092	50.822	46.5903	30.0486	46.1594	46.1741	40.9813
Alkalihalobacillus hemicellulosilyticus DSM 16731T	12		60.0649	59.898	60.1271	62.4021	59.352	60.0404	66.693	65.5635	67.1354	66.9765	66.1949		51.8711	40.1326	46.3053	46.9834	45.8096	46.4399	45.6239	45.8034	46.9265	44.6244	49.9771	55.0609	54.1435	41.7015	41.1789	40.7719	45.9556	40.4683	40.1707	46.4505	41.7666	36.1017	38.713	41.3815	40.5174	27.4418	40.7864	42.1123	37.4073
Alkalihalobacillus marmarensis DSM 21297T	13		61.6156	61.7986	60.9127	63.3137	61.0879	61.7802	66.2653	65.9115	65.9139	66.6674	68.4008	63.3721		45.596	51.9683	48.452	49.8205	49.9564	49.97	49.826	48.9508	48.5263	58.8214	57.9595	56.638	51.746	48.2777	43.6427	46.4849	46.7825	45.7714	54.9004	48.6659	40.3348	44.3784	49.851	47.3632	29.0013	44.2406	46.3761	41.1466
Alkalihalobacillus lonarensis 25nlgT	14		55.3334	55.5042	55.1585	57.464	56.3446	56.2086	57.2356	57.3862	57.1945	57.1882	58.3617	56.2863	57.7885		48.7084	49.4188	49.8841	48.279	49.9927	49.8764	50.3508	48.9534	44.2701	45.5624	43.8182	39.4017	37.1795	38.0711	36.0823	34.9747	32.5205	38.0469	37.0147	34.2679	33.2639	37.0614	35.5327	23.4987	34.8109	39.5797	36.3477
Alkalihalobacillus shacheensis HNA-14 T	15		56.6673	56.4357	56.1249	58.698	57.9444	57.6127	58.5744	58.7996	58.7077	58.8111	60.2885	57.8151	59.6424	63.1819		57.9104	57.4202	57.6213	57.3774	57.4009	58.6458	56.0082	49.7002	51.3304	50.7446	45.7356	43.3237	42.2146	39.219	38.4514	37.3675	45.9123	45.0275	35.8251	40.4956	42.8263	39.4268	26.2611	38.4087	46.9543	41.5194
Alkalihalobacillus clausii DSM 8716T	16		55.4153	55.2611	55.2108	57.8311	56.7233	56.6442	57.2132	57.195	57.2697	56.975	59.0269	56.7135	57.6664	63.8869	64.7464		64.2921	67.7555	64.1696	64.0126	88.6403	62.3751	47.1424	51.6325	50.9251	43.0316	41.373	44.3886	37.2858	35.5137	35.3662	40.962	41.9689	36.8933	41.1291	41.3807	38.1168	26.1779	38.513	45.7502	42.3203
Alkalihalobacillus oshimensis DSM 18940T	17		54.6152	54.1724	54.1031	56.6559	55.9961	55.9809	56.2705	56.2596	56.3627	55.8243	57.7349	55.3139	56.9235	61.3625	62.3445	65.9383		68.6044	92.1168	99.1452	65.7324	88.473	46.7646	48.6945	47.1475	43.7246	40.9562	42.74	37.2082	35.1803	34.3843	40.6373	40.5819	36.9262	39.6289	40.1398	38.424	24.8107	36.9353	46.3546	39.5175
Alkalihalobacillus patagoniensis DSM 16117T	18		54.6414	54.6144	54.7464	57.5925	56.5209	56.6721	56.9071	56.7927	56.8027	56.5999	58.1981	56.0914	57.4427	63.2845	64.5936	69.4773	68.6348		68.5736	68.4438	67.8955	67.6421	46.4187	48.4891	47.6256	43.7002	41.893	42.9912	36.9834	34.7415	34.4572	40.9803	42.5047	37.5957	40.9681	40.8038	39.3345	24.8744	38.0298	46.5411	39.9304
Alkalihalobacillus lehensis DSM 19099	19		54.4633	54.2225	54.1082	56.813	56.1406	55.7466	56.3994	56.212	56.5055	55.797	57.6198	55.3916	56.8916	61.6094	62.3511	65.786	98.7374	68.7538		91.8195	65.587	87.3921	46.6756	48.5909	46.995	43.7821	40.9479	42.7132	37.0975	35.4205	34.4421	40.5183	40.3475	36.9285	39.7264	39.943	38.3435	24.9089	37.1515	46.0268	39.2249
Alkalihalobacillus plakortidis DSM 19153	20		54.5969	54.1883	54.1214	56.6088	55.9786	56.0238	56.2793	56.3198	56.3191	55.8004	57.7785	55.2963	56.9301	61.3778	62.3504	65.9991	99.9765	68.6482	98.7161		65.4598	88.1405	46.7243	48.767	47.2488	43.6538	40.9263	42.829	37.2231	35.2991	34.4421	40.5842	40.5191	37.0096	39.6182	40.1512	38.485	24.8614	36.9267	46.388	39.4825
Alkalihalobacillus rhizosphaerae SC-N012T	21		55.3973	55.2767	55.226	57.8038	56.9575	56.7072	57.3131	57.4631	57.5142	57.1998	59.1527	56.4703	57.8267	64.127	64.9926	96.5721	66.0196	69.7142	65.948	66.0403		63.7707	47.3697	51.4436	49.9664	43.6557	41.6632	45.1515	37.8679	35.8153	34.794	41.1909	42.2108	37.5	41.368	41.3653	38.5268	26.0439	38.8056	46.6808	42.1689
Alkalihalobacillus miscanthi AK13T	22		54.36	53.96	54.1	56.45	56.02	55.85	55.96	56.13	56.21	55.51	57.31	55.06	56.8	61.38	62.29	65.68	93.5	68.48	93.39	93.52	65.96		45.6289	47.427	45.6342	42.8829	40.5437	41.8993	35.9757	34.1932	33.6611	39.653	39.9958	36.8893	39.0085	39.2777	37.7414	24.0079	36.5567	44.9185	38.8063
Alkalihalobacillus ligniniphilus L1T	23		63.1526	62.5558	62.5406	62.5497	60.9779	60.9815	64.907	64.7329	64.7624	65.2052	68.1584	62.1926	65.429	58.0358	59.3331	58.7276	57.1281	57.6662	56.9752	57.1143	58.6778	57.08		56.9388	56.8313	48.2113	47.4544	43.7367	45.707	45.2638	43.7224	54.8817	48.1068	38.1134	43.9555	47.5397	44.7012	28.3407	44.3284	43.9863	39.6019
Alkalihalobacillus okuhidensis DSM 13666T	24		61.4012	60.7479	60.6808	60.4751	59.219	59.175	62.5753	62.6239	62.6475	62.6563	64.4631	61.5088	63.5592	57.7202	58.7984	57.7722	55.7138	56.0686	55.6932	55.6742	57.6121	55.57	67.2746		82.9293	46.7779	45.6566	45.7029	46.0117	43.0434	41.2737	49.5068	47.0345	39.1866	42.6556	45.4575	43.2302	28.2761	41.8016	45.0318	41.3774
Alkalihalobacillus halodurans DSM 497T	25		61.7132	61.4233	61.0481	61.278	59.8373	59.9716	63.3675	63.1806	63.4531	63.6195	65.4134	62.0479	64.1397	57.5965	58.8609	58.3597	56.1849	56.501	56.2618	56.1699	58.0293	56.07	67.6466	98.4892		45.7198	44.6384	44.1424	45.8633	42.0465	44.1966	48.9443	46.2949	37.5493	41.6563	46.0368	42.2561	27.6192	41.1476	44.3475	40.6675
Alkalihalobacillus macyae DSM 16346T+B49/	26		56.1135	56.0341	54.978	54.5487	53.3779	53.4744	55.3456	55.1512	55.4688	55.3607	56.4444	53.7676	55.9368	52.7002	53.6045	52.5024	51.8933	52.2106	51.8001	51.8216	52.5597	51.71	56.5355	55.1228	55.3133		62.1774	46.1731	42.2974	40.9507	40.2172	47.3009	45.0516	42.7931	46.5267	51.032	50.3418	30.0817	44.0573	47.7795	42.1775
Alkalihalobacillus caeni HB172195T	27		56.84	56.47	55.72	54.76	53.86	53.66	55.64	55.65	55.66	55.34	56.85	54.27	55.85	53.03	53.49	52.56	51.81	52.04	51.79	51.81	52.73	51.65	57.49	55.66	55.98	63.6		44.2744	41.4436	41.2704	40.1977	47.0251	43.9363	42.0994	45.7792	51.2787	51.6399	29.3238	42.5608	44.8168	40.9682
Alkalihalobacillus murimartini LMG 21005T	28		54.1092	54.1381	53.6424	53.5764	53.0566	53.2977	54.012	54.4574	54.0868	54.4518	55.579	53.2721	54.3008	52.5339	52.857	52.9855	51.8033	52.2756	51.9207	51.7797	53.2562	51.87	55.6731	54.9297	54.8573	54.4865	55.11		38.3897	35.8938	34.7993	41.0127	40.5629	45.9649	49.4998	47.7248	45.0754	29.7297	48.609	44.9286	41.2355
Anaerobacillus alkalidiazotrophicus DSM 22531T	29		61.1376	61.2756	59.7563	57.24	55.822	56.3294	59.9045	60.3935	60.1091	60.4819	59.892	57.4944	58.9642	53.7449	54.4748	53.5498	52.6965	53.1843	52.7606	52.6519	53.4677	52.76	59.5087	58.4665	58.8382	54.8642	55.7	53.6774		54.3309	51.1056	48.199	40.2313	35.2665	36.9416	42.2323	41.5061	25.8727	39.4123	38.7451	35.8742
Anaerobacillus arseniciselenatis DSM 15340T	30		60.705	60.6432	59.2415	56.1744	55.214	55.0862	59.0888	59.0637	59.0073	59.3238	59.1967	56.5562	58.3565	53.0701	54.0443	52.8652	52.152	52.4446	52.2142	52.1772	53.0529	51.98	59.2664	57.7517	57.7999	54.9494	55.74	53.1468	71.663		54.0691	50.1453	38.5622	33.0655	36.072	41.4892	41.5679	26.9081	37.2812	36.5372	33.7134
Anaerobacillus isosaccharinicus NB2006T	31		60.9698	60.9899	59.1637	57.0197	55.5923	55.5088	59.4999	59.4219	59.0219	59.2944	59.5964	56.9668	58.6455	52.9657	54.2672	53.4358	52.4839	52.6532	52.5399	52.4952	53.4562	52.3	59.4386	57.9347	58.1741	54.9488	56.07	53.5819	71.802	72.6393		46.2123	37.3845	33.3632	36.7179	43.0451	41.7956	24.5097	37.2175	35.5988	33.7023
Desertibacillus haloalkaliphilus KJ1-10-99T	32		64.7361	64.4548	63.4272	59.8429	57.9015	58.3695	61.9417	62.4301	61.9452	62.5661	63.0421	60.0527	62.2542	56.0143	57.3337	55.7898	54.9871	55.4186	54.8454	55.0459	55.9755	54.74	63.5538	61.6528	61.8927	56.7229	57.45	55.0699	61.2497	61.1521	60.8751		48.49	36.9113	42.4616	46.9147	44.468	27.5911	42.7382	42.4536	38.7984
Alteribacillus bidgolensis P4BT	33		57.1316	57.1776	56.6463	55.0987	54.2934	54.2983	56.3055	56.7402	56.0897	56.4168	57.7331	55.3687	57.0749	53.7324	54.8482	53.7138	52.5872	53.4244	52.5395	52.5062	53.7347	52.54	58.0163	57.3806	57.295	54.2716	54.49	52.9003	55.414	54.9021	54.8612	58.4658		34.6214	42.5866	43.2465	40.1226	25.2728	38.4341	42.602	38.8776
Bacillus cereus ATCC 14579T	34		53.3034	53.4601	52.434	52.326	51.6263	51.5535	52.7458	53.0533	52.9436	52.983	54.1336	51.6625	52.9989	51.1999	51.262	50.7055	49.9284	50.0304	49.9999	49.9208	51.0112	49.84	53.7418	52.9251	53.2545	53.4257	54.1	55.9926	52.9235	52.742	52.5005	53.5084	51.3545		45.7563	44.2662	44.4392	26.7026	44.022	39.2776	38.3454
Peribacillus simplex DSM 1321T	35		54.4376	54.4037	53.8007	54.0917	52.9892	52.6223	54.3609	54.7702	54.1219	54.6826	55.1024	53.0958	54.3382	51.8081	52.5314	52.318	51.0032	51.8704	51.2562	51.0282	52.4108	51.04	55.4366	53.9426	54.3196	54.4393	55.01	57.9453	53.9565	53.0946	53.9597	55.1272	53.2095	56.4125		52.3044	49.8265	31.4767	47.3921	43.9575	39.8522
Cytobacillus firmus NBRC 15306T	36		56.1692	56.2698	55.4247	55.3774	54.5188	53.6968	55.7031	56.3396	55.5472	56.0863	57.045	54.1831	55.9341	52.4513	53.3986	52.6676	51.8746	52.2386	51.7166	51.803	52.7309	51.7	56.7062	55.3933	55.9228	56.4798	57.79	58.14	55.5097	55.2426	55.8259	56.5124	53.9271	57.062	61.6531		60.1936	32.7182	49.7403	45.3667	43.1559
Mesobacillus jeotgali DSM 18226T	37		55.7259	55.6086	54.854	54.5033	53.3647	52.6266	55.0851	55.0613	54.7136	54.7338	55.7841	53.5441	55.1499	52.2218	52.5297	51.7302	51.1296	51.4579	51.1938	51.1353	51.66	51.15	55.9134	54.6049	54.8999	56.0074	56.46	57.2273	54.9757	54.72	55.0512	56.0303	53.201	56.0886	60.4453	67.0945		34.0464	46.6446	44.17	40.9138
Neobacillus niacini DSM 2923T	38		51.8586	52.4372	51.1994	50.2292	49.3135	49.6666	51.6789	51.6345	51.106	52.3368	51.6958	50.0267	50.9571	47.669	48.9642	48.8916	48.0287	48.3406	48.2582	47.9966	48.6958	48.05	51.8963	51.1292	51.5726	51.8025	52.43	54.2196	51.0397	51.5384	51.7902	51.8687	49.3843	52.8129	57.7161	61.0284	60.7566		29.5024	29.2644	24.9963
Metabacillus fastidiosus NBRC 101226T	39		55.4302	55.4775	54.4362	54.2332	52.9365	53.555	55.3535	55.4138	54.5919	55.2111	56.499	53.9059	55.172	51.7702	52.4238	52.2392	51.0839	51.7468	51.1428	51.0807	52.2924	50.92	56.0828	54.8129	54.9953	55.0725	55.56	59.5993	54.8184	53.7624	54.6	55.7449	53.2324	56.5775	59.0895	60.4677	58.969	55.6488		40.8606	38.1392
Oceanobacillus iheyensis HTE831T	40		51.941	52.0093	52.0794	52.6822	52.3238	51.8944	51.9314	52.2272	52.3865	52.7395	52.7467	51.5736	52.3676	50.6459	52.3031	51.5593	51.1724	51.7538	51.105	51.185	51.4736	51.21	52.5706	52.523	52.5961	52.6346	52.89	52.4251	51.4404	50.9383	51.2794	52.8063	51.7822	51.3044	53.02	53.7216	53.0403	49.6015	52.3943		56.7979
Virgibacillus pantothenticus DSM 26T	41		52.123	51.9842	51.7377	51.6929	51.2692	50.8188	51.9577	51.8421	51.7853	51.8352	52.6861	51.4167	51.9591	50.9118	51.7307	51.7229	50.249	50.4151	50.1874	50.2377	51.6158	50.25	52.6782	52.4762	52.6683	52.3645	52.94	52.5041	51.4737	50.6155	51.1405	52.5538	51.9133	51.5933	52.7819	54.1222	53.5915	49.8176	52.6226	62.2736
